# Supplementary material for: Identification of Residues in the Heme Domain of Soluble Guanylyl Cyclase that are Important for Basal and Stimulated Catalytic Activity
Source: PubMed Central journal article supplement (PMC3212528; doi:10.1371/journal.pone.0026976), 2011-11-09
Supplement: pone.0026976.s001.pdf [file pone.0026976.s001.pdf]

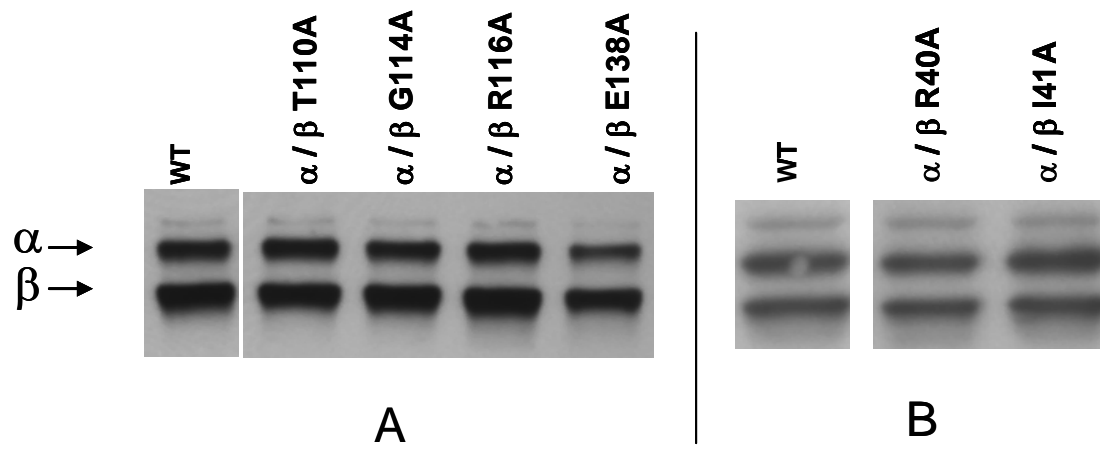

**Figure S1:** Western blot analysis with antibodies against the  $\alpha$  and  $\beta$  subunits of WT and HNOX mutants transiently expressed (48 h) in COS-7 cells. 10 $\mu$ g of cytosolic fraction were electrophorated on 8% SDS-gel. A and B are two separate transfections
