# Supplementary material for: Identification of Residues in the Heme Domain of Soluble Guanylyl Cyclase that are Important for Basal and Stimulated Catalytic Activity
Source: PubMed Central journal article supplement (PMC3212528; doi:10.1371/journal.pone.0026976), 2011-11-09
Supplement: pone.0026976.s002.pdf [file pone.0026976.s002.pdf]

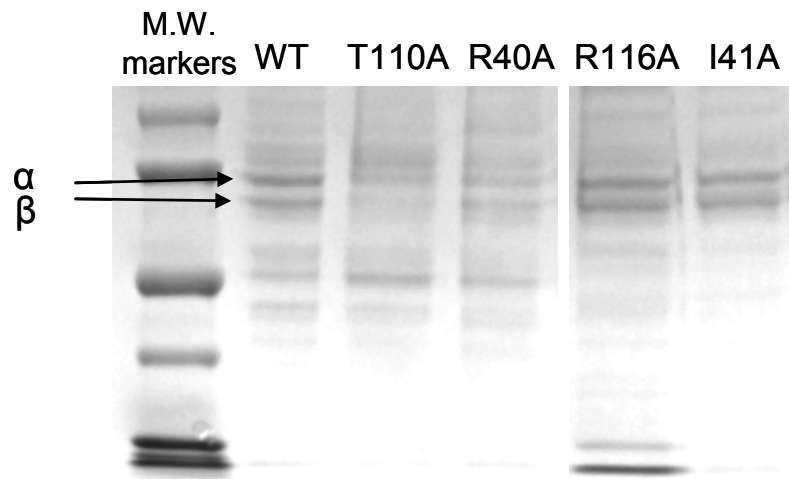

Figure S2: Coomassie blue staining of semi-purified WT and HNOX mutants. Approximately 5  $\mu\text{g}$  of each WT and mutants were electrophorated on an SDS-gel under reducing, denaturing conditions and stained with Coomassie.
