# Supplementary material for: Identification of Residues in the Heme Domain of Soluble Guanylyl Cyclase that are Important for Basal and Stimulated Catalytic Activity
Source: PubMed Central journal article supplement (PMC3212528; doi:10.1371/journal.pone.0026976), 2011-11-09
Supplement: pone.0026976.s003.pdf [file pone.0026976.s003.pdf]

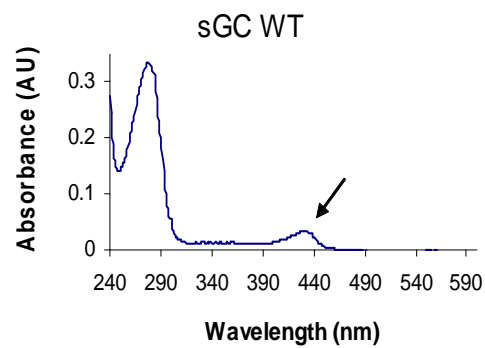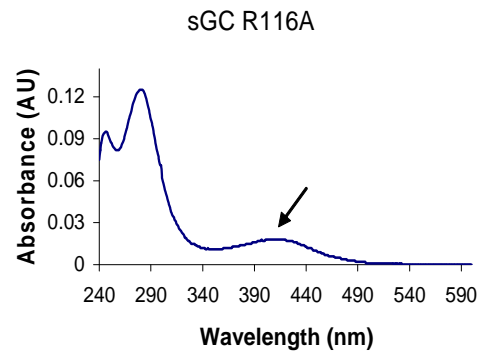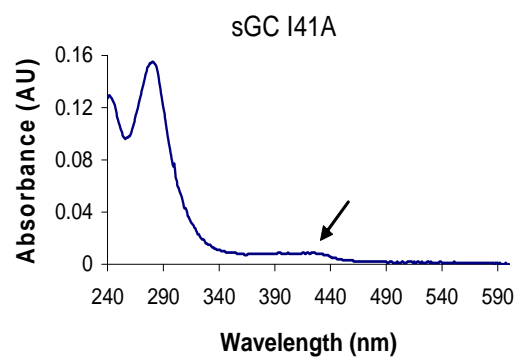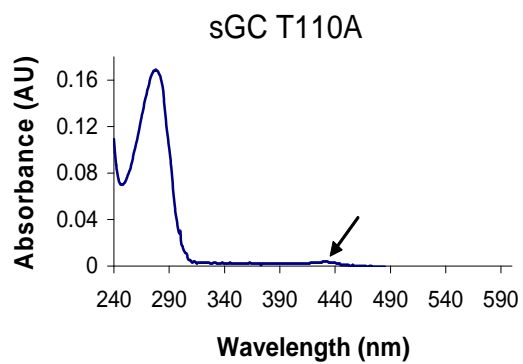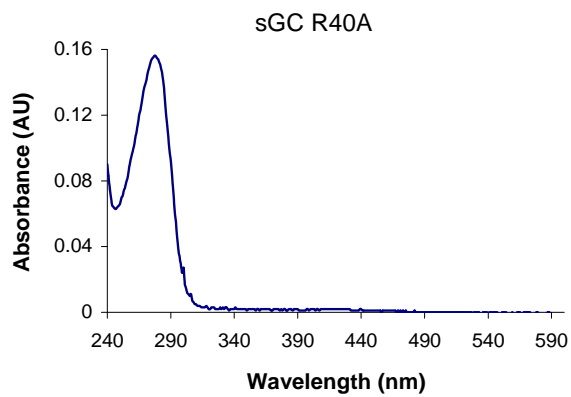

**Figure S3:** Spectra of absorbance (240-600nm) of semi-purified WT and mutants. UV-Vis was collected as described under Material and Methods. Arrow indicates the maximum peak between 410 and 430 nm and the corresponding maximum value. No peak was detectable for R40A.
