# Supplementary material for: Identification of Residues in the Heme Domain of Soluble Guanylyl Cyclase that are Important for Basal and Stimulated Catalytic Activity
Source: PubMed Central journal article supplement (PMC3212528; doi:10.1371/journal.pone.0026976), 2011-11-09
Supplement: pone.0026976.s004.pdf [file pone.0026976.s004.pdf]

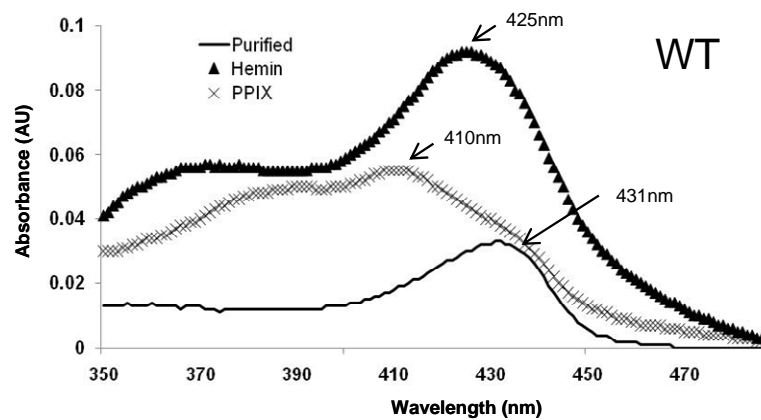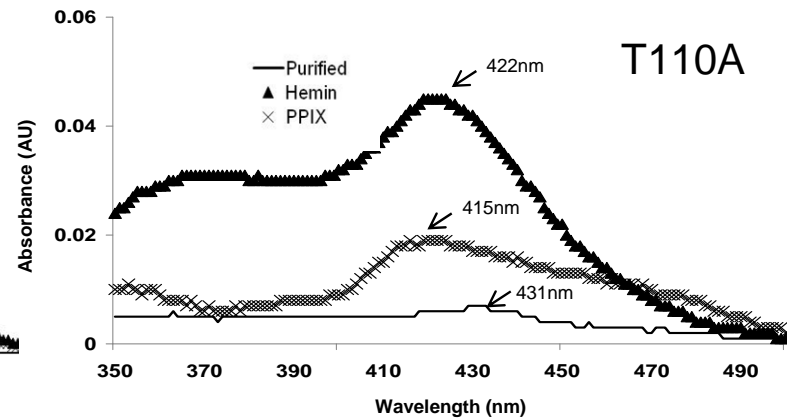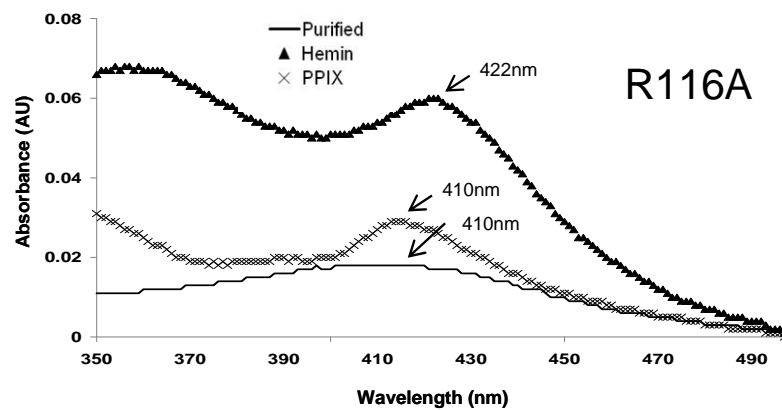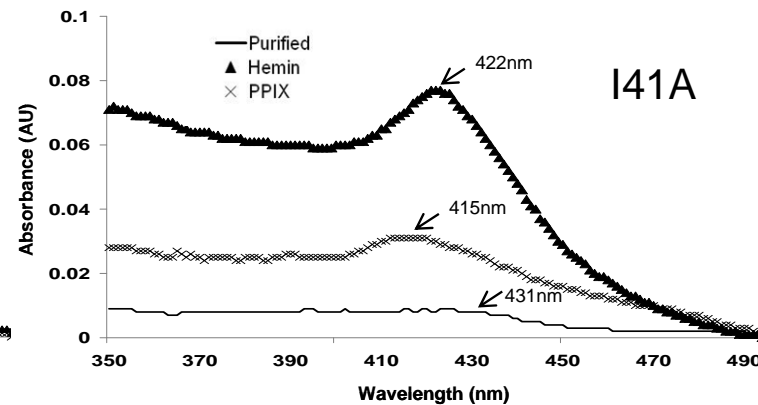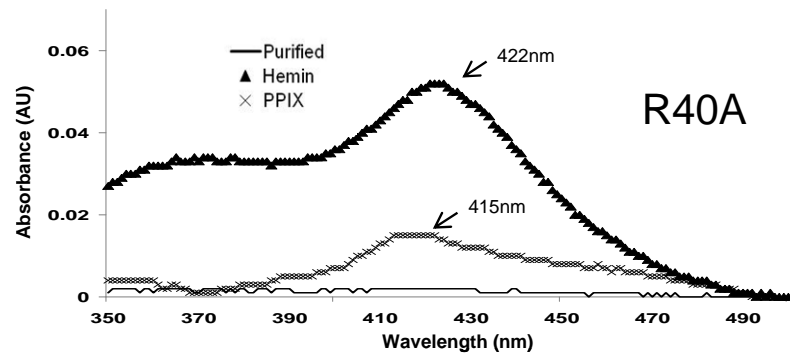

**Figure S4:** Spectra of absorbance (240-600nm, only 350-500 nm shown) of semi-purified WT and mutants in the absence or presence of 5 $\mu$ M hemin and PPIX after heme reduction with 5mM DTT. UV-Vis was collected as described under Material and Methods.
